# Supplementary material for: Interferon-α Promotes the Expression of Cancer Stem Cell Markers in Oral Squamous Cell Carcinoma
Source: PubMed Central journal article supplement — J Cancer. 2017 Jul 22;8(12):2384–93. doi: 10.7150/jca.19486 (PMC5560157; doi:10.7150/jca.19486), 2017-07-22

**Figure S1.** Immunofluorescence images of ALDH1A1 staining in HN4 and HN30 cells after  $\text{INF}\alpha$  treatment.

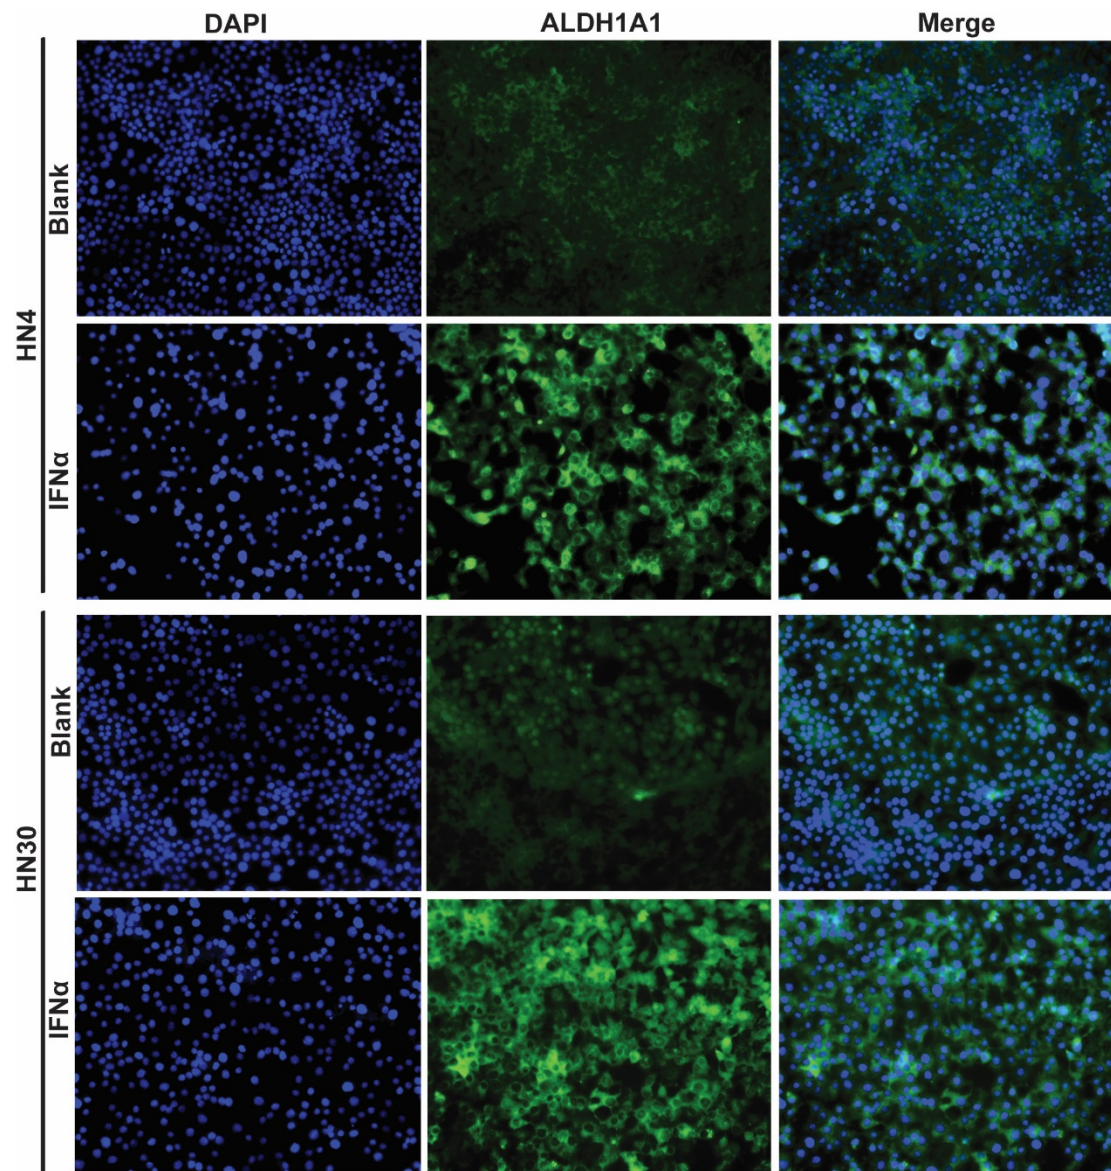

Supplement: jcav08p2384s1.pdf [file jcav08p2384s1.pdf]
